# Non Mycobacterial Virulence Genes in the Genome of the Emerging Pathogen *Mycobacterium abscessus*

Fabienne Ripoll<sup>1,9</sup>, Sophie Pasek<sup>2,9</sup>, Chantal Schenowitz<sup>3</sup>, Carole Dossat<sup>3</sup>, Valérie Barbe<sup>3</sup>, Martin Rottman<sup>1</sup>, Edouard Macheras<sup>1,4</sup>, Beate Heym<sup>1,4</sup>, Jean-Louis Herrmann<sup>1</sup>, Mamadou Daffé<sup>5</sup>, Roland Brosch<sup>6</sup>, Jean-Loup Rislér<sup>7</sup>, Jean-Louis Gaillard<sup>1,4\*</sup>

**1** EA3647, UFR de médecine Paris Ile-de-France Ouest, Université de Versailles St-Quentin, Garches, France, **2** Unité de Recherche Systématique, Adaptation, Evolution (UMR 7138), Université Pierre-et-Marie-Curie, Paris, France, **3** Génoscope, Evry, France, **4** Laboratoire de Microbiologie, Hôpital Ambroise Paré (Assistance Publique-Hôpitaux de Paris), Boulogne, France, **5** Institut de Pharmacologie et Biologie Structurale (UMR 5089), Toulouse, France, **6** Institut Pasteur, UP Pathogénomique Mycobactérienne Intégrée, Paris, France, **7** Laboratoire Statistique et Génome, UMR CNRS-INRA 8071-1152, Evry, France

## Abstract

*Mycobacterium abscessus* is an emerging rapidly growing mycobacterium (RGM) causing a pseudotuberculous lung disease to which patients with cystic fibrosis (CF) are particularly susceptible. We report here its complete genome sequence. The genome of *M. abscessus* (CIP 104536T) consists of a 5,067,172-bp circular chromosome including 4920 predicted coding sequences (CDS), an 81-kb full-length prophage and 5 IS elements, and a 23-kb mercury resistance plasmid almost identical to pMM23 from *Mycobacterium marinum*. The chromosome encodes many virulence proteins and virulence protein families absent or present in only small numbers in the model RGM species *Mycobacterium smegmatis*. Many of these proteins are encoded by genes belonging to a “mycobacterial” gene pool (e.g. PE and PPE proteins, MCE and YrbE proteins, lipoprotein LpqH precursors). However, many others (e.g. phospholipase C, MgtC, MsrA, ABC Fe(3+) transporter) appear to have been horizontally acquired from distantly related environmental bacteria with a high G+C content, mostly actinobacteria (e.g. *Rhodococcus* sp., *Streptomyces* sp.) and pseudomonads. We also identified several metabolic regions acquired from actinobacteria and pseudomonads (relating to phenazine biosynthesis, homogentisate catabolism, phenylacetic acid degradation, DNA degradation) not present in the *M. smegmatis* genome. Many of the “non mycobacterial” factors detected in *M. abscessus* are also present in two of the pathogens most frequently isolated from CF patients, *Pseudomonas aeruginosa* and *Burkholderia cepacia*. This study elucidates the genetic basis of the unique pathogenicity of *M. abscessus* among RGM, and raises the question of similar mechanisms of pathogenicity shared by unrelated organisms in CF patients.

**Citation:** Ripoll F, Pasek S, Schenowitz C, Dossat C, Barbe V, et al. (2009) Non Mycobacterial Virulence Genes in the Genome of the Emerging Pathogen *Mycobacterium abscessus*. PLoS ONE 4(6): e5660. doi:10.1371/journal.pone.0005660

**Editor:** Niyaz Ahmed, University of Hyderabad, India

**Received:** December 9, 2008; **Accepted:** April 28, 2009; **Published:** June 19, 2009

**Copyright:** © 2009 Ripoll et al. This is an open-access article distributed under the terms of the Creative Commons Attribution License, which permits unrestricted use, distribution, and reproduction in any medium, provided the original author and source are credited.

**Funding:** This work received financial support from the association “Vaincre la Mucoviscidose”. The funders (Vaincre la Mucoviscidose) had no role in study design, data collection and analysis, decision to publish, or preparation of the manuscript.

**Competing Interests:** The authors have declared that no competing interests exist.

\* E-mail: jean-louis.gaillard@apr.aphp.fr

These authors contributed equally to this work.

## Introduction

Mycobacteria form a group of over one hundred species, ranging from harmless saprophytic organisms to major human pathogens. The well known pathogenic species, such as *Mycobacterium tuberculosis*, *Mycobacterium leprae* and *Mycobacterium ulcerans*, belong to the subgroup of slowly growing mycobacteria (SGM). By contrast, rapidly growing mycobacteria (RGM)—almost 60 species of which have been identified—usually live in the soil or water and only rarely cause human infections [1]. *Mycobacterium abscessus* is one of the few RGM able to infect humans and is undoubtedly the most frequently isolated and the most difficult to combat [2].

*M. abscessus* was first described by Moore and Frerichs in 1953 [3]. These authors reported the isolation of a previously unknown mycobacterium from a human knee infection with subcutaneous abscess-like lesions (type strain *M. abscessus* ATCC 19977T), hence the name “*abscessus*”. With the recognition of *Mycobacterium chelonae* (now *M. chelonae*) in 1972, these two RGM organisms were

classified as two subspecies of the same species. Over two decades, they were collectively designated “*M. chelonae*”, or even grouped with the RGM *Mycobacterium fortuitum* under the designation “*M. fortuitum* complex” [4]. It was only in 1992 that *M. abscessus* was separated from *M. chelonae* [5], and this separation soon resulted in the recognition that *M. abscessus* has a particular pathogenicity in humans [6]. Very recently, *M. abscessus* itself (now *M. abscessus sensu lato*) was shown to consist of three species: *M. abscessus sensu stricto*, *M. massiliense* and *M. bolletii* [7,8]. These species are very closely related and cause a similar spectrum of human infections [9,10]. Thus, hereafter, unless otherwise stated, they will be collectively referred to as “*M. abscessus*”.

Following its recognition as a distinct entity, and the development of molecular methods of identification for mycobacteria, *M. abscessus* has emerged as an important human pathogen over the last 10 years, causing many more cases of infection than *M. chelonae* and *M. fortuitum*—historically the most important pathogenic RGM [2,11]. *M. abscessus* is responsible for more than 80% of all pulmonary infections due to RGM in the United States

and is associated with a much higher fatality rate than any other RGM [6]. *M. abscessus* lung infection usually, but not exclusively, develops in subjects with underlying lung disorders (e.g. bronchiectasis, cystic fibrosis [CF]) [6]. The infection of CF patients is becoming a major issue: *M. abscessus* is being recovered with increasing frequency from CF patients, including young children. It causes a serious, life-threatening lung disease and is responsible for disseminated, often fatal infections following lung transplantation [12–18]. *M. abscessus* is also a leading cause of sporadic and epidemic cases of skin and soft-tissue RGM infections, following the use of contaminated syringes or needles, and after plastic or cardiac surgery [19,20]. *M. abscessus* is not only pathogenic, it is also one of the most antibiotic-resistant RGM species [1]. It is resistant to most disinfectants and biocides and thrives in the most hostile environments—a feature associated with its propensity to cause outbreaks of healthcare-associated disease [1].

The pathogenicity of *M. abscessus* has been investigated in recent studies in various cell and mouse models. *M. abscessus* is an intracellular bacterium able to grow in macrophages and free-living amoebae [8,21]. *M. abscessus* infection in mice is associated with granulomatous lesions spontaneously evolving toward caseous lesions [22]. Interferon gamma (IFN- $\gamma$ ) and tumor necrosis factor (TNF) are the key cytokines of the murine host response, and are absolutely required to control infection [22]. Studies have also identified major differences in pathogenic profile between the two forms in which *M. abscessus* is isolated from humans: the S (smooth) form and the R (rough) form [21]. The R form lacks a surface polyketide compound, glycopeptidolipid (GPL) [23,24], and causes more severe infections in mice, strongly inducing TNF secretion by macrophages [23].

Over the last decade, genomic studies have shown how the ecological and pathogenic characteristics of certain SGM have changed through evolution. For example, *M. leprae*, the causal agent of leprosy, represents a model case of adaptation through massive genome reduction [25]. Gene deletion and decay have resulted in the elimination from *M. leprae* of many of the major metabolic activities present in the closely related species, *M. tuberculosis*, the tubercle bacillus. This process of gene deletion is associated with the divergent evolution of *M. leprae* towards an obligate intracellular lifestyle. Other mycobacteria have acquired plasmid-borne virulence factors. The presence of a giant plasmid involved in the synthesis of a potent macrolide toxin forms the basis, for example, of the unique pathogenic properties of *M. ulcerans*, the causal agent of Buruli ulcer [26]. Genomic studies have also revealed how the deletion of large chromosomal regions led to the attenuation of *Mycobacterium bovis* bacillus Calmette-Guérin, the only vaccine against tuberculosis currently available [27,28].

Very few genomic studies have been performed in the RGM group, and none has dealt with a “pathogenic” RGM. The first RGM to be sequenced—*M. smegmatis*—is a model mycobacterium widely used in research laboratories as a surrogate host for the expression of heterologous mycobacterial genes. The other RGM organisms sequenced (e.g., *M. vanbaalenii*) have been studied because they are able to degrade polycyclic aromatic hydrocarbons and are therefore of potential interest for use in environmental bioremediation [29]. We report here the complete genome sequence of *M. abscessus* (*sensu stricto*) and the insights it has provided into the genetic basis of its the pathogenicity of this bacterium, which is highly unusual among RGM. Whole-genome analysis not only revealed the presence of many “mycobacterial” virulence genes, but also showed that *M. abscessus* had a large series of specific genes in common with two pathogens most frequently isolated from CF patients—*Pseudomonas aeruginosa* and *Burkholderia*

*cepacia*. These genes were presumably acquired from distantly related environmental bacteria via horizontal gene transfer (HGT).

## Results

### The *M. abscessus* genome

**General features and comparison with other *Mycobacterium* species.** The *M. abscessus* (*sensu stricto*) genome consists of a circular chromosome of 5,067,172 base pairs (bp) including 4,920 predicted coding sequences (CDS) with a coding capacity of 93%, and a G+C content of 64% other than in the prophage region (59.5%) (Table 1 and Fig. 1A). A circular 23 kb mercury resistance plasmid (23,319 bp; G+C content, 68%) was also detected (Fig. 1B) and shown to have a nucleotide sequence 99.9% identical to that of the 23 kb pMM23 mercury resistance plasmid from *Mycobacterium marinum* (strain ATCC BAA-535) [30]. Like pMM23, the 23 kb *M. abscessus* plasmid carries a mercury resistance operon flanked by two genes encoding site-specific recombinases; it also encodes a relaxase/helicase that may function in conjugation or mobilization (Fig. 1B).

The *M. abscessus* chromosome is about 1.92 Mb smaller than the *M. smegmatis* genome; these two genomes are collinear, with no evidence of extensive rearrangements (Fig. S1). The *M. abscessus* chromosome includes 47 tRNA genes, but has a single ribosomal RNA operon, a feature of SGM genomes [31]. It contains a full-length prophage (81 kb) resembling the members of a recently characterized group of dsDNA tailed mycobacteriophages [32]. This prophage is integrated into a Met tRNA and contains 112 CDS, 8 (7.1%) of which are similar to bacterial proteins with identified functions (Fig. 2). There are also three prophage-like elements (Table S1). Unlike other sequenced mycobacteria, *M. abscessus* has very few insertion sequences (IS) in its genome: there are only five IS, each present as a single copy (Table 1). These elements include the composite element ISMab1 [33], which is probably part of an integrated plasmid (gene encoding a putative plasmid replication initiator protein in its vicinity [MAB\_2100]).

**Functional information.** It was possible to assign a biological function to 60.5% of the CDS on the *M. abscessus* chromosome; 27.5% were found to be conserved hypothetical proteins and 12% were unique. The distributions of *M. abscessus* and *M. smegmatis* proteins, according to the Kegg classification, were different, with a lower proportion of *M. abscessus* proteins involved in xenobiotic biodegradation and metabolism ( $p < 10^{-4}$ , chi-squared test), and in biosynthesis of secondary metabolites ( $p = 0.02$ ) (Table S2). Consistent with the smaller size of the *M. abscessus* genome, most paralogous families were found to be underrepresented in *M. abscessus* with respect to *M. smegmatis* (Table S3). This was particularly true for paralogs involved in the adaptation of microorganisms to diverse environments (e.g. ABC transporters, two-component sensor histidine kinases). Most of the small number of protein families found to be overrepresented in *M. abscessus* are known to be associated with mycobacterial pathogenicity (e.g. PE and PPE proteins, MCE and YrbE proteins, lipoprotein LpqH precursors, lipases/esterases/monooxygenases). Others, such as the members of the ArsC family, salicylate hydroxylases and cysteine desulfurases, are hallmarks of organisms living in soil or water.

**Transfers of blocks of genes from non mycobacterial environmental organisms.** We detected 17 gene clusters syntenic with regions from non mycobacterial organisms, and which are absent from other sequenced mycobacterial species (Tables 2 and S4), suggesting multiple *en bloc* HGTs. The factors encoded by these gene clusters are much more similar to proteins

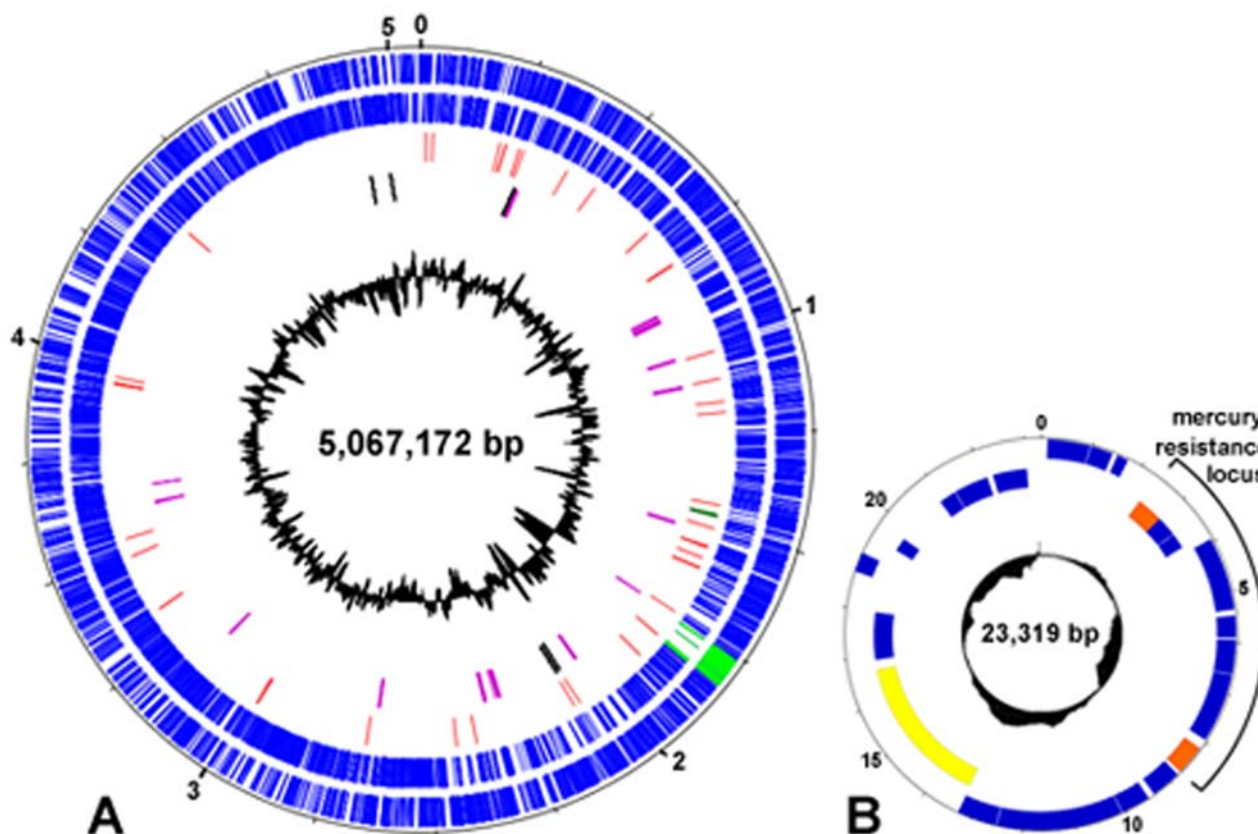

**Figure 1. The *M. abscessus* CIP 104536T genome.** (A) Circular representation of the chromosome. The initiation codon for the *dnaA* gene was chosen as the starting point for numbering. The scale is in Mb. Moving inward, the first two circles show forward and reverse genes (blue lines); light-green lines indicate phage genes. The third circle shows tRNA genes (red) and rRNA operon (dark-green). The fourth circle shows genes presumably acquired “en bloc” from non mycobacterial organisms by HGT (purple) and IS elements (black). The inner black histogram represents the local G+C content (scale: 50% to 69%). (B) Circular representation of the 23-kb mercury resistance plasmid. The scale is in kb. Forward and reverse genes and the local G+C content are indicated with the same code as for the chromosome map. The plasmid carries a mercury resistance operon flanked by two genes encoding site-specific recombinases (MAB\_p04c and MAB\_p10, orange); it also encodes a relaxase/helicase that may function in conjugation or mobilization (MAB\_p15c, yellow).

doi:10.1371/journal.pone.0005660.g001

**Table 1. General features of the *M. abscessus* genome and comparison with other *Mycobacterium* species.**

| Features                | RGM              |                      |                                 |                       | SGM                |                                |                                  |                                   |
|-------------------------|------------------|----------------------|---------------------------------|-----------------------|--------------------|--------------------------------|----------------------------------|-----------------------------------|
|                         | Mabs             | Msmeg <sup>(a)</sup> | <i>M. gilvum</i> <sup>(a)</sup> | Mvanba <sup>(b)</sup> | Mtb <sup>(c)</sup> | <i>M. avium</i> <sup>(a)</sup> | <i>M. marinum</i> <sup>(d)</sup> | <i>M. ulcerans</i> <sup>(e)</sup> |
| Genome size, bp         | 5,067,172        | 6,988,209            | 5,619,607                       | 6,491,865             | 4,411,532          | 5,475,491                      | 6,636,827                        | 5,631,606                         |
| G+C content, %          | 64.1             | 67                   | 67                              | 67                    | 65.6               | 68                             | 65                               | 65                                |
| Protein coding, %       | 93               | 90                   | 92                              | 91                    | 90.8               | 88                             | 89                               | 72                                |
| Proteins                | 4920             | 6716                 | 5241                            | 5979                  | 3959               | 5120                           | 5424                             | 4160                              |
| tRNAs                   | 47               | 47                   | 47                              | 50                    | 45                 | 45                             | 46                               | 45                                |
| rRNA operons            | 1                | 2                    | 2                               | 2                     | 1                  | 1                              | 1                                | 1                                 |
| Prophage elements, no.  | 4 <sup>(f)</sup> | NR                   | NR                              | NR                    | 2                  | NR                             | 10                               | 2                                 |
| IS, total no. of copies | 5                | 112                  | NR                              | NR                    | 54                 | NR                             | 7                                | 302                               |

<sup>(a)</sup><http://www.ncbi.nlm.nih.gov>.

<sup>(b)</sup>[29].

<sup>(c)</sup>[31].

<sup>(d)</sup>[30].

<sup>(e)</sup>[87].

<sup>(f)</sup>Including the 81-kb full-length prophage and three prophage-like elements detailed in Table S1.

Abbreviations: RGM, rapidly growing mycobacteria ; SGM, slowly growing mycobacteria ; Mabs, *M. abscessus* ; Msmeg, *M. smegmatis*; Mvanba, *M. vanbaalenii*; Mtb, *M. tuberculosis*; nt, nucleotide; IS, insertion sequence; NR, not reported.

doi:10.1371/journal.pone.0005660.t001

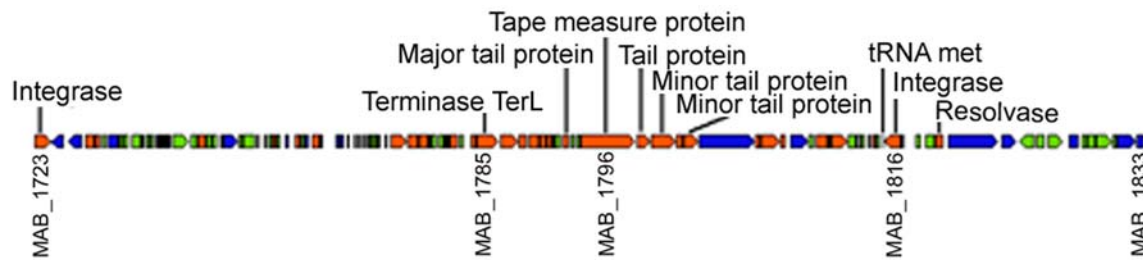

### Homologs of bacterial proteins with identified functions

| Sequence n° | Best hit     | Organism                           | Function                  | E-value |
|-------------|--------------|------------------------------------|---------------------------|---------|
| MAB_1725c   | Q9RMP2_MYCSM | <i>M. smegmatis</i>                | Acetyltransferase         | e-116   |
| MAB_1756    | A0LS21_ACICI | <i>Acidothermus cellulolyticus</i> | Transcription factor WhiB | 1e-16   |
| MAB_1763    | Q02AH6_SOLUE | <i>Solibacter usitatus</i>         | Transcription factor XRE  | 1e-19   |
| MAB_1801    | Q82JU1_STRAW | <i>Streptomyces avermitilis</i>    | Putative beta-lactamase   | 2e-45   |
| MAB_1805    | Q08VR7_STIAU | <i>Stigmatella aurantiaca</i>      | Glycoside hydrolase       | 5e-31   |
| MAB_1827c   | A0QQC3_MYCSM | <i>M. smegmatis</i>                | Putative lipoprotein LpqJ | 1e-17   |
| MAB_1832    | Q5YU12_NOCHA | <i>Nocardia farcinica</i>          | Putative invasin          | 3e-12   |
| MAB_1833    | A0PR91_MYCUL | <i>M. ulcerans</i>                 | Possible lipoprotein LpqQ | 2e-07   |

**Figure 2. The *M. abscessus* full-length prophage.** Each arrow represents a predicted protein-coding gene (length approximately to scale). Orange, similar to other phage proteins; blue, similar to other bacterial proteins; green, hypothetical protein. The table shows homologs of bacterial proteins with identified functions (Uniprot Blast search). doi:10.1371/journal.pone.0005660.g002

from syntenic organisms than to proteins from other mycobacteria, or have no significant mycobacterial homologs (Table S4). The hypothesis of multiple HGT of blocks of genes is also supported by significant differences in codon usage for proline and arginine between this subset of genes and other *M. abscessus* genes ( $p < 10^{-4}$ , chi-squared test). The organisms with the best conserved syntenies are all environmental bacteria with a high G+C content, mostly actinobacteria (*Rhodococcus* sp., *Streptomyces* sp., *Nocardia* sp.), but also *Pseudomonas* sp. and *Burkholderia* sp. (Tables 2 and S4). There are more horizontally acquired gene clusters in the 5' half of the genome than in the 3' half (Fig. 1), with most concentrated into two "hot-spots" (MAB\_0888c-1098, MAB\_2027-2286). Examples of such gene clusters are shown in Fig. 3.

### Virulence factors involved in intracellular parasitism

Many factors known to be involved in *M. tuberculosis* virulence have orthologs in the *M. abscessus* genome and best hits with proteins from other mycobacteria (Table S5). In addition to these "mycobacterial" factors, the *M. abscessus* genome encodes a number of "non mycobacterial" factors known to play a major role in microbial pathogenesis.

#### "Mycobacterial" factors

**The PE- PPE and ESAT-6 families.** The PE and PPE proteins, with their characteristic proline-glutamate (PE), or proline-proline-glutamate (PPE) N-terminal motifs, are often found associated with ESX gene clusters, which encode ATP-dependent specific secretion systems and are named after the 6 kDa early secretory antigenic target ESAT-6 [31,34,35]. There are three PE and six PPE genes in *M. abscessus*, and three ESX loci, all similar to the essential and highly immunogenic ESX-3 gene cluster of *M. tuberculosis*.

**MCE and yrbE proteins.** MCE (mammalian cell entry) proteins allow mycobacteria to invade host cells [36]. There are seven *mce* operons in *M. abscessus* and only four in *M. smegmatis*, one of which is interrupted by an IS element in *M. smegmatis* (not shown). It has recently been suggested that the number of *mce* operons may be related to pathogenicity in actinomycetes: there are six *mce* operons in *Nocardia farcinica*, one of the agents causing nocardiosis, whereas *Streptomyces avermitilis* and *Streptomyces coelicolor*, both nonpathogenic soil bacteria, each have only one copy of the *mce* operon [37].

**LpqH-like proteins.** LpqH, also known as the 19 kDa protein, is an immunodominant antigen recognized by T cells and sera from patients with tuberculosis [38]. *M. abscessus* possesses four genes encoding LpqH-like proteins, scattered throughout the genome, suggesting that these molecules may be involved in the pathogenicity of *M. abscessus*, possibly through modification of the host response.

**Regulators of virulence factors.** *M. abscessus* has homologs of a large number of regulators known to control virulence factors in *M. tuberculosis*. Most appear to have counterparts in *M. smegmatis*, but there are a few exceptions, consistent with the specialization of *M. abscessus* towards pathogenicity. For example, *M. abscessus* possesses homologs of the five sigma factors shown to be involved in *M. tuberculosis* virulence (SigA, SigC, SigD, SigE, SigH), whereas *M. smegmatis* has homologs of only four of these factors (SigA, SigD, SigE, SigH). *M. abscessus* also has a protein homologous to the VirS virulence transcription factor of *M. tuberculosis*, whereas *M. smegmatis* does not.

#### "Non mycobacterial" factors

**Phospholipase C.** Bacterial phospholipases C are key virulence factors allowing intracellular pathogens to escape

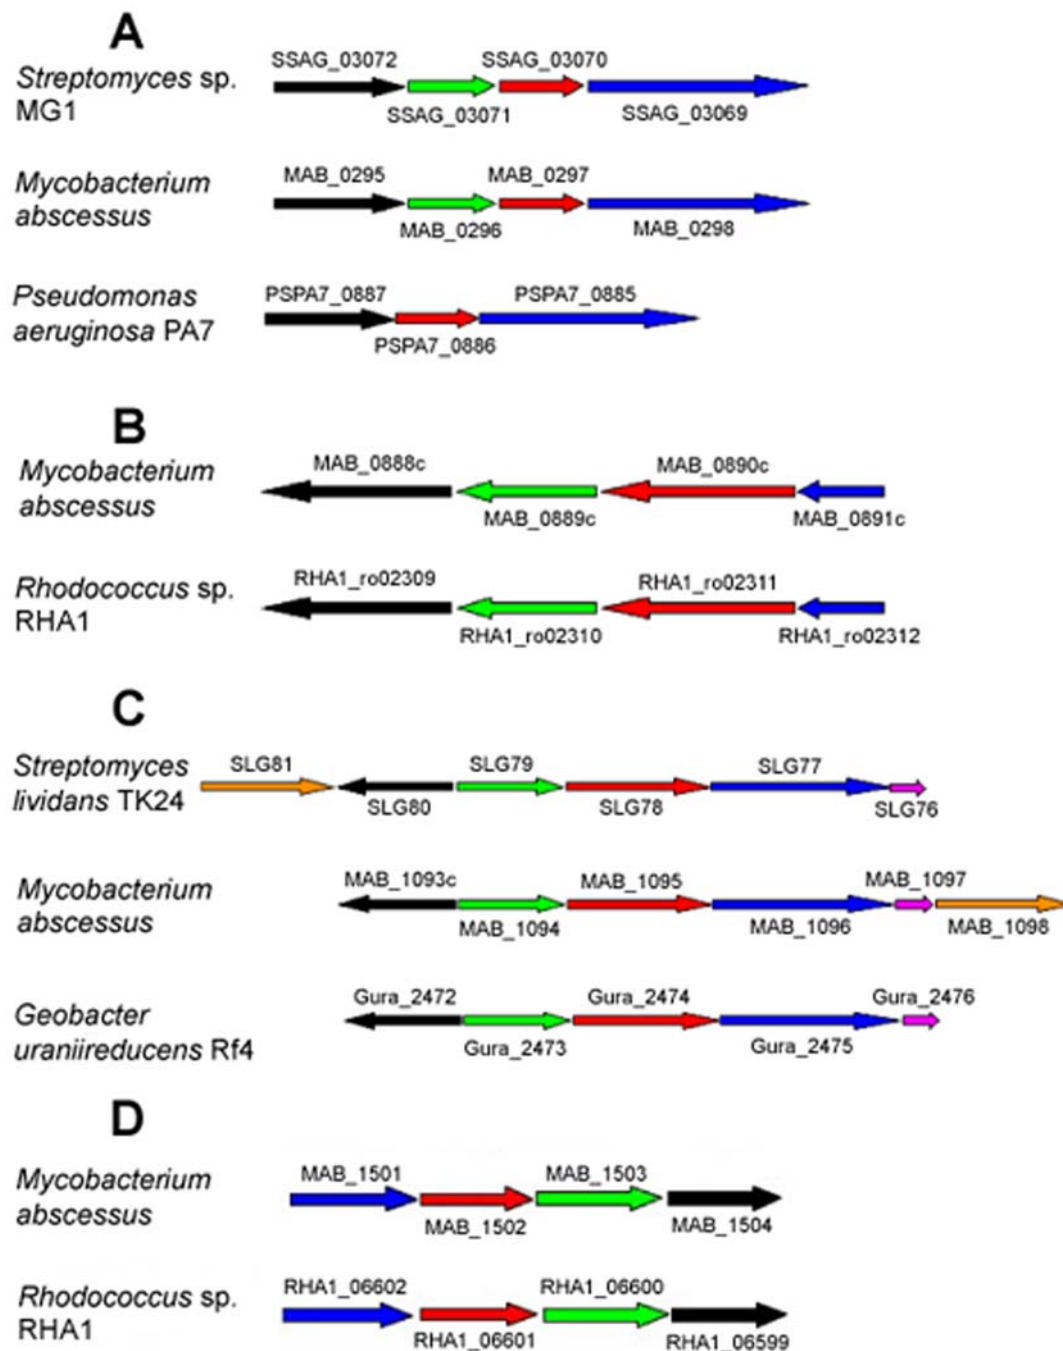

**Figure 3. Examples of gene blocks presumably inherited from non mycobacterial organisms.** (A) MAB\_0295-0298 (phenazine biosynthesis). (B) MAB\_0888c-0891c (homogentisate catabolism). (C) MAB\_1093c-1098 (DNA degradation [*dnd* locus]). (D) MAB\_1501-1504 (iron uptake). Genes are drawn approximately to scale and are indicated according to their names in the EMBL-EBI database. doi:10.1371/journal.pone.0005660.g003

phagosomal vacuoles by disrupting eukaryotic membranes [39]. *M. tuberculosis* has four phospholipase C-encoding genes: *plcABC* and *plcD* [31]. Triple (*plcABC*) and quadruple (*plcABCD*) mutants have negligible enzyme activity and attenuated virulence in mouse models, suggesting that phospholipase C activity is required for the growth of mycobacteria *in vivo* [40]. Phospholipase C activity may be particularly critical for mycobacteria infecting human hosts, as suggested by the presence of the region encompassing *plcABC* in clinical *Mycobacterium microti* isolates, but not in attenuated isolates from voles [41]. The *M. abscessus* phospholipase C closely

resembles proteins from *Streptomyces* sp., *Chromobacterium violaceum* and *P. aeruginosa*. The locus containing the corresponding gene differs from those of the phospholipase C genes in *M. tuberculosis* (Fig. 4), and phylogenetic analysis is also consistent with horizontal acquisition from non mycobacterial organisms (Fig. 5).

**MgtC.** Intracellular pathogens make use of MgtC proteins to increase intracellular  $Mg^{2+}$  concentration, facilitating their survival within cells. As first demonstrated in *Salmonella*, these proteins are essential for bacterial growth within professional phagocytes, such as macrophages [42]. *M. tuberculosis* has an *mgtC* gene, the

**Table 2.** Gene clusters syntenic with non mycobacterial organisms and not observed in other mycobacteria<sup>(a)</sup>.

| Cluster no. | Mabs CDS.                        | Main synteny <sup>(b)</sup>                                        | Putative function                                        |
|-------------|----------------------------------|--------------------------------------------------------------------|----------------------------------------------------------|
| 1           | MAB_0295-0298 <sup>(c)</sup>     | <i>Streptomyces</i> sp. MG1 (B4V5P4_9ACTO) <sup>(d)</sup>          | Phenazine biosynthesis                                   |
| 2           | MAB_0300c-0303                   | <i>Nocardia farcinica</i> (Q5YP17_NOCF A)                          | Resistance to salicylic acid-mediated defense mechanisms |
| 3           | MAB_0888c-0891c                  | <i>Rhodococcus</i> sp. (Q0SEC1_RHOSR) <sup>(e)</sup>               | Homogentisate catabolic pathway                          |
| 4           | MAB_0899c-0911 <sup>(f)</sup>    | <i>Nocardia farcinica</i> (Q5YXU1_NOCF A) <sup>(g,h)</sup>         | Phenylacetic acid degradation                            |
| 5           | MAB_1014c-1019c                  | <i>Rhodococcus</i> sp. (Q0S4M6_RHOSR)                              | Unknown                                                  |
| 6           | MAB_1093c-1098                   | <i>Streptomyces lividans</i> (Q460H9_STRLI) <sup>(i)</sup>         | DNA degradation ( <i>dnd</i> locus)                      |
| 7           | MAB_1501-1504                    | <i>Rhodococcus</i> sp. (strain RHA1) (Q0S261_RHOSR) <sup>(j)</sup> | Iron uptake                                              |
| 8           | MAB_1720-1722                    | <i>Rhodococcus</i> sp. (Q0S6K3_RHOSR)                              | Two-component system                                     |
| 9           | MAB_2027-2032                    | <i>Pseudomonas putida</i> F1 (A5W4P6_PSEP1)                        | Biosynthesis of phytotoxic peptides and antibiotics      |
| 10          | MAB_2251-2253                    | <i>Burkholderia cepacia</i> complex (Q0B890_BURCM)                 | Unknown                                                  |
| 11          | MAB_2255-2257 <sup>(k)</sup>     | <i>Myxococcus xanthus</i> (Q1D6A2_MYXXD)                           | Polyketide biosynthesis                                  |
| 12          | MAB_2257-2258 <sup>(l,m)</sup>   | <i>Streptomyces ambofaciens</i> (A3KI34_STRAM)                     | Polyketide biosynthesis                                  |
| 13          | MAB_2278-2286 <sup>(n)</sup>     | <i>Streptomyces coelicolor</i> (Q9K3F5_STRCO)                      | Unknown                                                  |
| 14          | MAB_2610-2613                    | <i>Bacillus pumilus</i> (B4AMJ6_BACPU)                             | Carbohydrate transport                                   |
| 15          | MAB_3112-3115                    | <i>Nocardia farcinica</i> (Q5YN04_NOCF A)                          | Unknown                                                  |
| 16          | MAB_3569c-3574c <sup>(o,p)</sup> | <i>Streptomyces antibioticus</i> (Q0R4L5_STRAT)                    | Biosynthesis of secondary metabolites                    |
| 17          | MAB_3621c-3623                   | <i>Rhodococcus</i> sp. (Q0SA51_RHOSR) <sup>(q)</sup>               | Taurine metabolism                                       |

<sup>(a)</sup>Clusters comprising  $\geq 3$  syntenic genes.

<sup>(b)</sup>The organism and the homolog of the 5' *M. abscessus* gene product (in brackets, entry name in Swiss-Prot/TrEMBL database) are indicated.

<sup>(c)</sup>Upstream, MAB\_0292c is homologous to an ISX08 transposase from *Saccharopolyspora erythraea*.

<sup>(d)</sup>Also A6UZN8\_PSEA7-A6UZN6\_PSEA7 from *Pseudomonas aeruginosa* (strain PA7) (see also Fig. 3).

<sup>(e)</sup>Partial synteny (MAB\_0888c-0890c) in *B. cepacia*.

<sup>(f)</sup>Downstream, MAB\_0920 is homologous to a phenylacetic acid-responsive transcriptional repressor gene from *Kineococcus radiotolerans*.

<sup>(g)</sup>Also Q0SCR6\_RHOSR-Q0SCS7\_RHOSR from *Rhodococcus* sp. (strain RHA1).

<sup>(h)</sup>Partial synteny (MAB\_0906-0910) in *B. cepacia*.

<sup>(i)</sup>Also A5G4D2\_GEOUR- A5G4D6\_GEOUR from *Geobacter uraniireducens* (strain Rf4) (see also Fig. 3)

<sup>(j)</sup>Also syntenic regions in *B. cepacia* and in the pathogens *Salmonella* Paratyphi A, *Salmonella* Typhimurium, *Salmonella* Typhi, and *Burkholderia mallei*.

<sup>(k)</sup>Just upstream, MAB\_2254c is homologous to a PPE protein from *Mycobacterium vanbaalenii*.

<sup>(l)</sup>This cluster has only two genes but is part of a composite region encoding various polyketide synthases (see upstream, MAB\_2255-MAB\_2257).

<sup>(m)</sup>Just downstream, MAB\_2259 is homologous to a putative O-methyltransferase gene from *Myxococcus xanthus*.

<sup>(n)</sup>MAB\_2284 (homologous to Q9K3G5) is also homologous to the protein PrnC gene from *Burkholderia cepacia*.

<sup>(o)</sup>Except MAB\_3570c, which is homologous to a 4'-phosphopantetheinyl transferase gene from the Actinomycetales (A3R4S1\_9ACTO).

<sup>(p)</sup>MAB\_3574c is also homologous to a 3-oxoacyl-[acyl-carrier-protein] synthase III from *Frankia alni*.

<sup>(q)</sup>Partial synteny (MAB\_3621c-MAB\_3622c) in *B. cepacia*.

Abbreviations: Mabs, *M. abscessus*; CDS, coding sequence.

doi:10.1371/journal.pone.0005660.t002

disruption of which strongly attenuates virulence in both macrophages and mice [43]. The acquisition of *mgtC* genes by HGT is common among microbes and has been associated with pathogenicity [44]. There is an *mgtC* gene in *M. abscessus*, but not in *M. smegmatis*, providing further evidence that this gene is important for the intracellular lifestyle developed by *M. abscessus*. The *M. abscessus mgtC* gene seems to have been acquired by HGT, probably from actinobacteria (Fig. 4 and 5) [44].

**MsrA.** The peptide methionine sulfoxide reductase (MsrA) of *M. tuberculosis* is thought to protect this organism against the oxidative damage caused by the reactive nitrogen intermediates produced by macrophages [45]. The *M. abscessus msrA* gene is located at another genomic site, in the immediate vicinity of *sodA* (Fig. 4). The MsrA protein of *M. abscessus* closely resembles a protein from *Rhodococcus* sp. and does not cluster with mycobacterial proteins in the phylogenetic tree for MsrA (Fig. 5), providing further evidence for horizontal acquisition from a non mycobacterial gene pool.

**Iron uptake.** Bacterial pathogens have developed a number of systems for acquiring iron, which is present in limiting concentrations in living hosts. *M. abscessus* has a four-gene cluster very similar to a locus encoding an ABC Fe(3+) transporter in

*Rhodococcus* sp. This cluster also has closely related homologs in a number of major bacterial pathogens, including *Salmonella* sp. and *Burkholderia* sp. (Tables 2 and S4; Fig. 3D).

### “Non mycobacterial” factors relevant to the infection of CF patients (Tables 2 and S4; Fig. 3)

**Phenazine biosynthesis.** Phenazines are secondary metabolites with broad-spectrum antibiotic activity against bacteria, fungi and parasites, produced by *Pseudomonas* sp. and *Streptomyces* sp. Pyocyanin, the blue phenazine synthesized by *P. aeruginosa*, is a key virulence determinant *in vivo*, and is thought to be involved in the persistence of this pathogen in CF patients [46].

**Homogentisate catabolism.** The homogentisate catabolic pathway results in homogentisate being broken down into two compounds of central metabolism: fumarate and acetoacetate [47]. However, homogentisate is also a precursor for the biosynthesis of pyomelanin, a brown pigment generated through the extracellular accumulation and polymerization of homogentisate. Pyomelanin production appears to be a key step in the process by which *P. aeruginosa* adapts to the respiratory tract of CF patients, possibly facilitating iron acquisition [48].

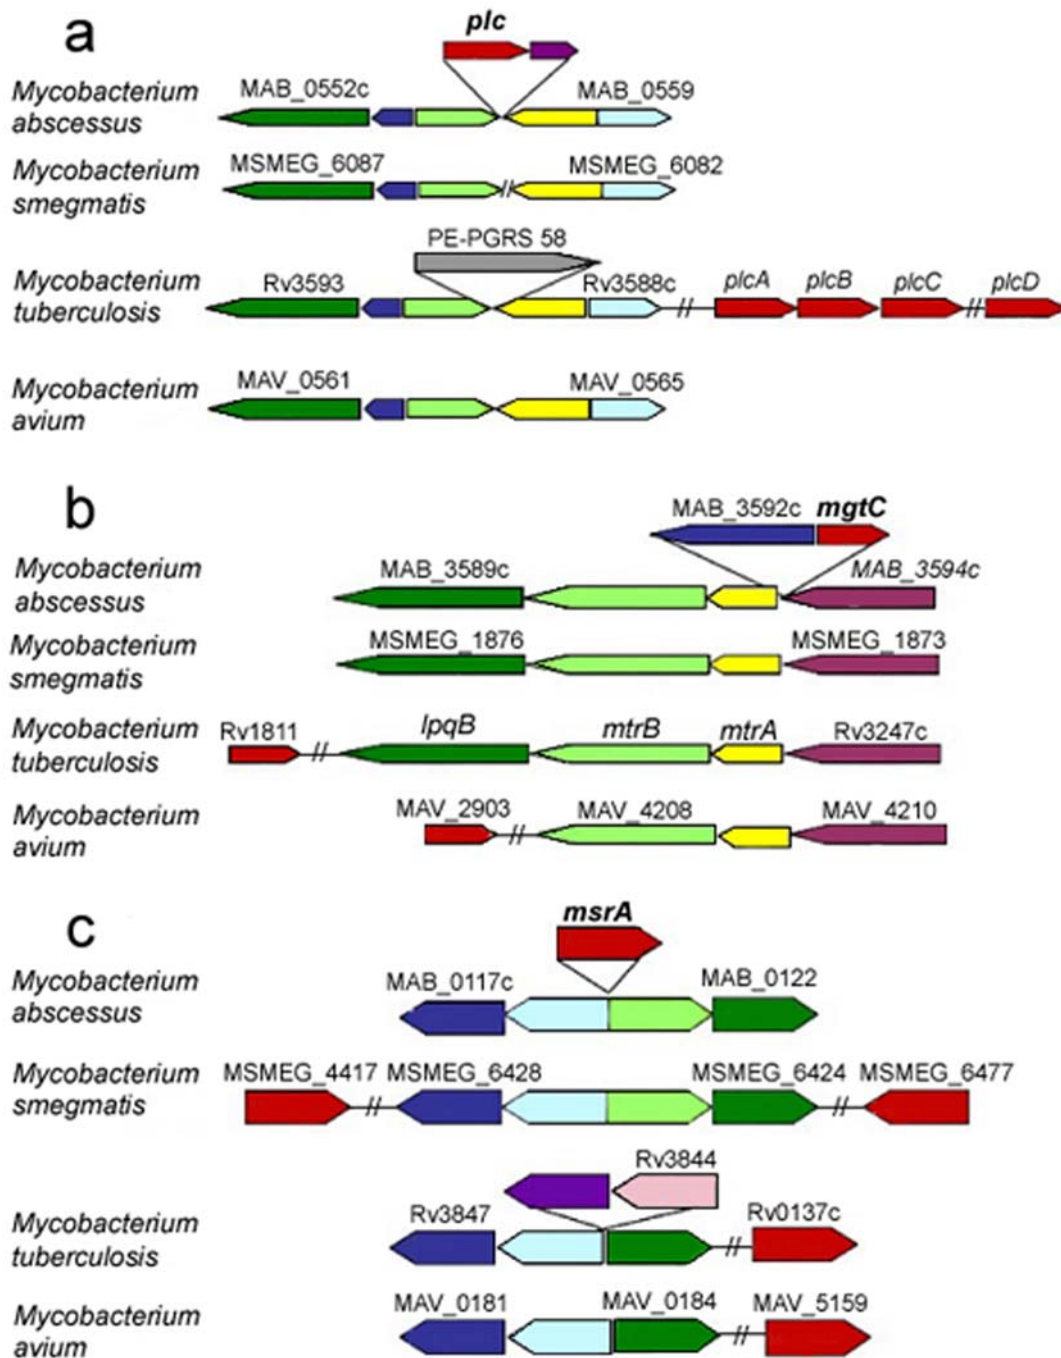

**Figure 4. *plc*, *mgtC* and *msrA* loci in *M. abscessus*: comparison with other mycobacteria.** a. *plc*: note that MAB\_0557 (transcriptional regulatory protein AraC) has no homolog at the counterpart of the *M. abscessus plc* locus in the other mycobacterial species, suggesting an insertion; also note the substitution for a PE-PGRS gene in the corresponding *M. tuberculosis* region. b. *mgtC*: note that the gene encoding MgtC is located at other genomic sites in *M. tuberculosis* and *M. avium*; also note that MAB\_3592c (probable chain fatty acid-CoA ligase, blue) has no homolog at the counterpart of the *M. abscessus mgtC* locus in the other mycobacterial species, also suggesting an insertion. c. *msrA*: note that MsrA-encoding genes are located at other genomic sites in other mycobacteria; and the presence of *sodA* (light blue) upstream of *M. abscessus msrA*; there is a substitution for a transposase gene (Rv3844) in the corresponding *M. tuberculosis* region. Out of scale. doi:10.1371/journal.pone.0005660.g004

**Phenylacetic acid degradation.** The region involved in phenylacetic acid degradation—the largest region of the *M. abscessus* genome acquired by HGT—is located downstream from the “homogenisate catabolism” region. The proteins encoded by this region constitute a complex functional unit, the phenylacetyl-CoA catabolon, which transforms various aromatic compounds

(e.g., styrene, 2-phenylethylamine) into phenylacetyl-CoA, which is subsequently catabolized into TCA intermediates [49]. The five-gene cluster putatively encoding the enzymes of the ring-hydroxylating complex (MAB\_0906-0910) is also present in *B. cepacia* and the homolog of MAB\_0910 is essential for *B. cepacia* survival in a rat model of chronic lung infection [50].

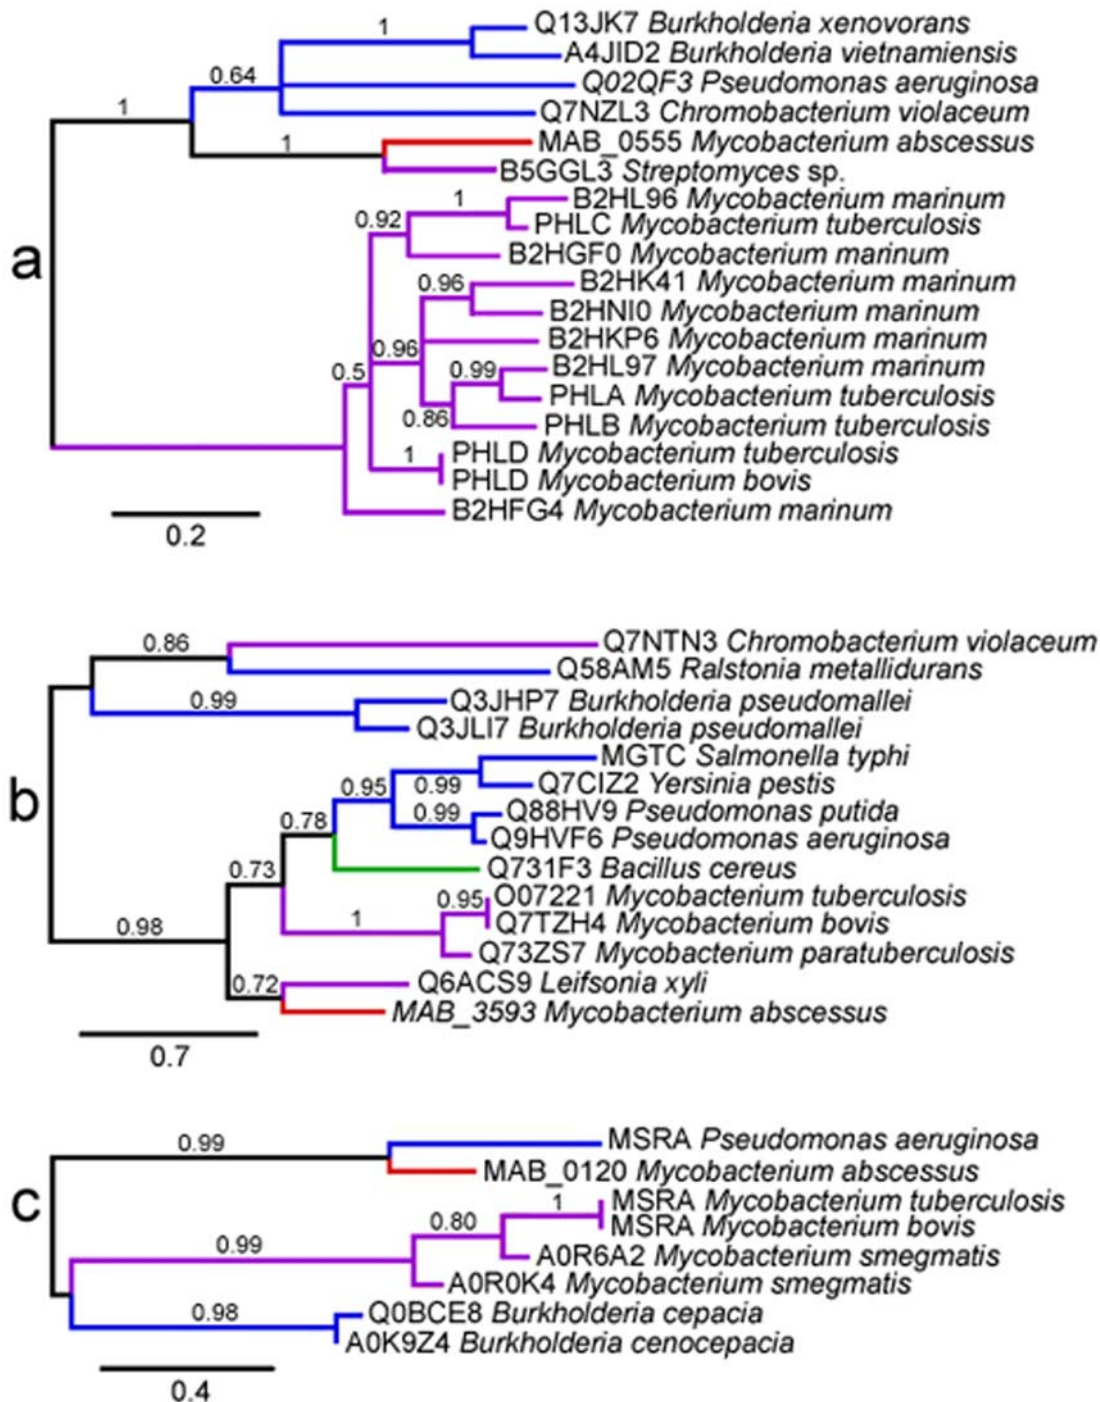

**Figure 5. Phylogenetic trees (maximum likelihood) of PIC (a), MgtC (b) and MsrA (c) proteins.** Branch supports values are indicated at the nodes. Branch colors indicate proteins from *M. abscessus* (red), Actinobacteria (purple), Proteobacteria (blue) and Firmicutes (green). Labels at the leaves show the Uniprot identifier of the proteins and the species they belong to.  
doi:10.1371/journal.pone.0005660.g005

**Cysteine desulfurases and the “Dnd phenotype”.** The *M. abscessus* genome encodes a large number of cysteine desulfurases (Table S3). One is part of a locus closely resembling the *S. lividans dndA-E* locus (Tables 2 and S4; Fig. 3), which is involved in the Dnd (DNA degradation) phenotype observed *in vitro* during DNA extraction [51]. A recent pulsed-field gel electrophoresis study showed that *M. abscessus* strains with a Dnd phenotype belonged to a small number of closely related clones

playing a major role in human disease [52]. The sputum of CF patients is extremely rich in DNA, which may constitute an important source of nutrients for *dnd*-positive strains.

#### Resistance to antimicrobial compounds

*M. abscessus* has achieved notoriety as one of the most drug-resistant mycobacterial species [1]. Much of this multidrug resistance may result from weak permeability of the cell wall,



but analysis of the *M. abscessus* genome has also revealed the presence of many potential drug resistance determinants. The hydrolytic or drug-modifying enzymes present in this species include an Ambler class A beta-lactamase, a rifampin ADP-ribosyl transferase, an aminoglycoside 2'-N-acetyltransferase and at least 12 homologs of aminoglycoside phosphotransferases. We also found four homologs of monooxygenases potentially involved in resistance to rifampin and tetracyclines, two FolP homologs conferring resistance to cotrimoxazole, one homolog of UDP-N-acetylglucosamine 1-carboxyvinyltransferase MurA conferring resistance to fosfomycin, and two homologs of 23S rRNA methylases conferring resistance to macrolides, including the *erm* gene product (MAB\_2297) recently shown to be involved in inducible macrolide resistance in *M. abscessus* [53]. Most of these drug resistance determinants are mycobacterial, with the notable exception of the Ambler class A beta-lactamase (MAB\_2875), which closely resembles beta-lactamases from the gram-negative bacteria *Pseudomonas luteola* and *Serratia fonticola* (not shown). The genome of *M. abscessus* also encodes many proteins potentially involved in drug-efflux systems, including members of the major facilitator family, ABC transporters and MmpL proteins. Finally, the presence of a single rRNA operon favors the occurrence of dominant mutations conferring resistance to aminoglycosides and macrolides [54].

We identified three putative *ars* operons scattered over the chromosome of *M. abscessus* [55]. *M. abscessus* is therefore likely to be resistant to high concentrations of arsenic [56]. Finally, due to the presence of *merB* within the *mer* operon, the 23 kb plasmid probably confers resistance to a wide range of organomercury compounds [57].

## Discussion

### Deciphering the ecology and biology of *M. abscessus*

The genetic information contained in the genome of *M. abscessus* tells us a great deal about the lifestyle of this microorganism in natural conditions. The presence of a large number of genes and operons involved in resistance to arsenic or encoding cysteine desulfurases is clearly a hallmark of an environmental organism living in soil or aquatic environments. However, *M. abscessus* also contains a whole series of genes known to be involved in intracellular survival (e.g., *mgtC*, *msrA*, *ple*), and is well-equipped to obtain energy from the degradation of eukaryotic host-derived lipids (numerous lipase-encoding genes), as observed for mycobacteria adapted to an intracellular lifestyle [58]. The low level of metabolic versatility (e.g., far fewer ABC transporters or two-component sensor histidine kinases than *M. smegmatis*) suggests that this bacterium tends to specialize in intracellular parasitism.

The most plausible hypothesis is that *M. abscessus* has evolved to escape predators, such as free-living amoebae [8] sharing the same ecosystem. Soil-dwelling amoebae are known to be most abundant at plant-soil interfaces, because these interfaces support the growth of various plant parasites, including bacteria, on which amoebae feed [59]. Consistent with this hypothesis, the genome of *M. abscessus* encodes a particularly large number of salicylate hydroxylases, enabling this bacterium to resist the salicylic acid-mediated defense mechanisms of plants [60]. This suggests that *M. abscessus* lives in close contact with plants and therefore has to deal with amoebae. This hypothesis may explain an extraordinary paradox in the epidemiology of *M. abscessus*: despite all the evidence to suggest that *M. abscessus* lives in soil and water—our own genomic data and the large number of epidemics linked to the direct or indirect use of non sterile water—this bacterium is

detected much less frequently in such environments than other closely related RGM, such as *M. chelonae* [61].

We analyzed an S phenotype strain. A major challenge for the future will be to determine the role of S $\leftrightarrow$ R switches in the natural lifecycle of *M. abscessus* (controlling whether this bacterium grows in the form of a biofilm) and its interaction with its hosts, including humans (modulation of the host response). GPL may be required for biofilm establishment or for escape from amoebae in aquatic environments [62], but seems to hinder the development of infection, probably by acting as a target of the specific immune response of the host [22]. We recently reported the *in vivo* isolation of an R variant from the type strain CIP 104536T [22]. Transcriptomic studies are currently underway to determine the mechanisms responsible for the loss of GPL production in this R variant and the associated events potentially accounting for its “hypervirulence” in mice. The data obtained should make it possible to identify the external signals involving in triggering the switching process.

### Evolutionary mechanisms

This study highlights the major role of horizontal gene transfers in the evolution of RGM. It is hardly surprising that this evolutionary mechanism, which has also been described in SGM [63,64], is particularly important in RGM, and that it involves a reservoir of genes from different bacteria with a high G+C content widely present in soil or water, such as *Streptomyces* sp., *Rhodococcus* sp. and pseudomonads. RGM come into contact with many other bacteria in the environment—often as part of a biofilm [65]—and they may exchange genetic material with these other bacteria [66]. Mycobacteriophages—or other bacteriophages with a wide host spectrum—may play a key role in such transfers, as they display extensive mosaicism, combining viral and bacterial genes in a vast gene pool [32]. Such a role in gene transfer is consistent with the presence of a full-length prophage sequence containing non mycobacterial genes in the *M. abscessus* genome. However, the presence of this prophage sequence does not exclude a role for other genetic vectors, such as plasmids, which are frequently found free or integrated into the genome within RGM [67].

The demonstration that pathogenicity genes of non mycobacterial origin are present in *M. abscessus* raises questions about the timing of their acquisition. The fact that the closely related species *M. chelonae* is also pathogenic in humans—an exceptional feature among RGM—strongly suggests that many of these genes were acquired before the separation of these two species. We are currently carrying out a comparative genomics study of *M. abscessus* and *M. chelonae* (<http://www.genoscope.cns.fr/spip/Mycobacterium-chelonae-and.html>), which should make it possible to confirm or to infirm this hypothesis. We have also recently made use of the genome sequence of *M. abscessus* to develop a multilocus sequence typing (MLST) approach. Our preliminary analyses on more than a hundred *M. abscessus* (*sensu lato*) strains suggest that there are three highly homogeneous groups, corresponding to the three previously described species (*M. abscessus sensu stricto*, *M. massiliense*, *M. bolletii*), with less than 1% divergence within groups and around 2% divergence between groups. The species of *M. abscessus sensu lato* therefore seem to have emerged relatively recently. However, it should be stressed that most of the strains of *M. abscessus* available from collections were isolated recently and mostly in a clinical context. Indeed, as stated above, *M. abscessus* is only very rarely isolated from the environment. There may therefore be a bias in the results, because we cannot rule out the possibility that strains capable of infecting humans constitute an unusual subpopulation.

One of the findings of this study was entirely unexpected: the presence of a mercury resistance plasmid almost identical to the pMM23 from the *M. marinum* strain recently sequenced by the team of Stinear (strain ATCC BAA-535) [30]. The pMM23 plasmid discovered in this strain, isolated from a patient in 1992 (Moffett Hospital, San Francisco), is exceptional in *M. marinum*, as none of the more than 40 other isolates of this species studied by the team of Stinear has been found to carry this plasmid [30]. The presence of this plasmid in *M. abscessus* is, thus, particularly interesting, as it demonstrates that exchanges may occur between *M. marinum*, a SGM, and *M. abscessus*, a RGM, either directly or via another organism, probably a mycobacterium. It also suggests that *M. abscessus* and *M. marinum* may live in the same ecosystems and may be transmitted to humans by similar mechanisms. Future work should determine the prevalence of this plasmid in *M. abscessus* and should assess whether this plasmid constitutes a useful marker (e.g., for epidemicity).

We were also surprised by the very low frequency of IS in the genome of the strain of *M. abscessus* that we sequenced, much lower than usually found in mycobacteria. Confirmation of this result is required, with a representative panel of isolates. If confirmed, this characteristic would have a major impact on the plasticity of the genome of *M. abscessus*. As elegantly demonstrated in *Escherichia coli*, reducing the number of IS elements renders bacterial genomes more stable, with a greater capacity for acquiring foreign DNA [68].

### Key factors shared with other major CF pathogens

This study provides new insight into the emergence of *M. abscessus* as a pathogen in CF patients. We were surprised to discover that the largest transferred regions detected in *M. abscessus* contained genes involved in the metabolism of aromatic compounds. Such systems are characteristic of pseudomonads in general, and of two major CF pathogens, *P. aeruginosa* and *B. cepacia*, in particular [49]. This implies that *M. abscessus* is able to live in the same ecosystems as *P. aeruginosa* and *B. cepacia*, with patients becoming infected from the same microbial reservoir. Another, not necessarily exclusive possibility is that these metabolic characteristics provide a selective advantage in CF patients, due either to their illness or the treatments increasingly used over recent years, such as aerosolized drug administration [69]. According to this hypothesis, *M. abscessus* may benefit from factors promoting its extracellular development and its implantation in the bronchial tract, before going on to cause deeper infection of the pulmonary parenchyma and ganglions.

Conversely, several *M. abscessus* factors typical of intracellular parasites are also present in *P. aeruginosa* and *B. cepacia*, the most notable examples being phospholipase C and the MgtC protein [70,71]. Both *P. aeruginosa* and *B. cepacia* produce two phospholipases C and two MgtC proteins [70,71]. An MgtC-like protein is also found in *Aspergillus fumigatus*—the main pathogenic fungus in CF patients—but not in closely related nonpathogenic species such as *Aspergillus nidulans*. Pseudomonads and other related organisms infecting CF patients have previously been considered to be exclusively “extracellular” pathogens. Our data raise questions about the interaction of these organisms with macrophages or other monocyte-derived cells in CF patients. This is consistent with the finding that the production of MgtC is required for the survival of *Burkholderia cenocepacia*—the main *B. cepacia* complex pathogen infecting CF patients—within macrophages [72,73].

A recent analysis of the genomes of various CF and non-CF *P. aeruginosa* isolates revealed mosaic structures, consisting of a conserved core component interrupted by strain-specific genomic islands acquired by HGT, which seem to provide CF isolates with

specific metabolic pathways involved in infection [74]. The identification of multiple episodes of HGT in *M. abscessus* strongly suggests that a similar evolutionary trend occurs within RGM. Along the same lines as the studies carried out in *P. aeruginosa* by the team of Lowry [74], comparative genomic studies of CF and non-CF *M. abscessus* isolates could prove particularly fruitful for elucidating the tropism of certain organisms for the respiratory tract of CF patients, opening up promising new possibilities for the control of microbial infections in CF patients.

### Materials and Methods

We sequenced *M. abscessus* (*sensu stricto*) CIP 104536T (= ATCC 19977T), using a whole-genome shotgun strategy (EMBL accession numbers: CU458896, chromosome; CU458745, plasmid). This strain is of the S phenotype, and can switch *in vivo* to an R phenotype [22]. Mycobacteria were grown in Middlebrook 7H9 broth supplemented with Tween 80. *M. abscessus* DNA, prepared using standard methods, was manipulated in the presence of 50  $\mu$ M thiourea (DNA in solution) or by replacing Tris buffer by HEPES at the same molarity (DNA in plugs), to prevent Tris-dependent DNA degradation [39]. We constructed three genomic libraries (inserts of 3–4, 8–10 and  $\sim$ 20 kb, respectively) and generated  $\sim$ 80,000 sequences (50,000, 20,000 and 10,000 sequences, respectively, giving 11-fold coverage). Putative protein-coding sequences were predicted by SHOW ([http://migale.jouy.inra.fr/outils/select\\_mig\\_outils\\_zpt](http://migale.jouy.inra.fr/outils/select_mig_outils_zpt)), tRNA genes by tRNAscan, and rRNA genes by RNAmmer [75,76]. Sequences were analyzed with the BIOFACET package and the BLAST software suite [77,78]. General features, such as G+C content (%), were assessed with ARTEMIS software [79]. The origin of replication was identified with ORILOC [80]. The circular representations of chromosome and plasmid were generated with DNAPlotter (<http://www.sanger.ac.uk/Software/Artemis/circular>). The *M. abscessus* full-length prophage was drawn with BugView (<http://www.gla.ac.uk/~dpl1n/BugView/index.html>). Whole genome dotplot comparison of *M. abscessus* versus *M. smegmatis* was drawn with Gepard (<http://mips.gsf.de/services/analysis/gepard>). CLUSTER-C was used to cluster genes into paralogous families [81]. Alien Hunter was used to screen the genome for regions with “atypical” sequence content [82]. Transfers of blocks of genes from non mycobacterial organisms were identified as follows. We first identified CDS more similar to proteins from non mycobacterial organisms than to mycobacterial proteins (no mycobacterial protein among the 50 best hits). We then used GeneTeam, with a delta value of 3 and visual inspection to search for areas of synteny with relevant non mycobacterial organisms [83]. Only clusters with at least 3 syntenic genes not found in other sequenced mycobacteria were retained. Phylogenetic analyses were carried out with the “Phylogeny.fr” web server (<http://www.phylogeny.fr>), using Muscle for multiple alignment and GBlocks for alignment curation, and constructing the phylogenetic trees with PhyML [84,85]. Branch supports were calculated with the approximate likelihood ratio test [86]. Distributions of *M. abscessus* and *M. smegmatis* proteins, according to the Kegg classification, were compared using chi-squared tests with continuity correction. To account for multiple testing, p-values were corrected according to Hochberg’s method. Differences were considered as statistically significant if corrected p-values were  $<0.05$ .

### Supporting Information

**Figure S1** Whole genome dotplot comparison of *M. abscessus* (horizontal axis) versus *M. smegmatis*.  
Found at: doi:10.1371/journal.pone.0005660.s001 (0.08 MB TIF)

**Table S1** M. abscessus prophage-like elements

Found at: doi:10.1371/journal.pone.0005660.s002 (0.03 MB DOC)

**Table S2** M. abscessus and M. smegmatis proteins involved in metabolism, according to the Kegg classification

Found at: doi:10.1371/journal.pone.0005660.s003 (0.04 MB DOC)

**Table S3** A selection of paralogous families

Found at: doi:10.1371/journal.pone.0005660.s004 (0.06 MB DOC)

**Table S4** Proteins encoded in the 17 horizontally acquired gene clusters, and their syntenic non mycobacterial homologs

Found at: doi:10.1371/journal.pone.0005660.s005 (0.06 MB DOC)

## References

- Brown-Elliott BA, Wallace RJ Jr (2002) Clinical and taxonomic status of pathogenic nonpigmented or late-pigmenting rapidly growing mycobacteria. Clin Microbiol Rev 15: 716–746.
- Griffith DE, Aksamit T, Brown-Elliott BA, Catanzaro A, Daley C, et al. (2007) An official ATS/IDSA statement: diagnosis, treatment, and prevention of nontuberculous mycobacterial diseases. Am J Respir Crit Care Med 175: 367–416.
- Moore M, Frerichs JB (1953) An unusual acid-fast infection of the knee with subcutaneous, abscess-like lesions of the gluteal region; report of a case with a study of the organism, *Mycobacterium abscessus*, n. sp. J Invest Dermatol 20: 133–169.
- Kubica GP, Baess I, Gordon RE, Jenkins PA, Kwapinski JB, et al. (1972) A cooperative numerical analysis of rapidly growing mycobacteria. J Gen Microbiol 73: 55–70.
- Kusunoki S, Ezaki T (1992) Proposal of *Mycobacterium peregrinum* sp. nov., nom. rev., and elevation of *Mycobacterium chelonae* subsp. *abscessus* (Kubica et al.) to species status: *Mycobacterium abscessus* comb. nov. Int J Syst Bacteriol 42: 240–245.
- Griffith DE, Girard WM, Wallace RJ Jr (1993) Clinical features of pulmonary disease caused by rapidly growing mycobacteria. An analysis of 154 patients. Am Rev Respir Dis 147: 1271–1278.
- Adekambi T, Berger P, Raoult D, Drancourt M (2006) rpoB gene sequence-based characterization of emerging non-tuberculous mycobacteria with descriptions of *Mycobacterium bollettii* sp. nov., *Mycobacterium phocaicum* sp. nov. and *Mycobacterium aubagnense* sp. nov. Int J Syst Evol Microbiol 56: 133–143.
- Adekambi T, Reynaud-Gaubert M, Greub G, Gevaudan MJ, La Scola B, et al. (2004) Amoebal coculture of “*Mycobacterium massiliense*” sp. nov. from the sputum of a patient with hemoptoic pneumonia. J Clin Microbiol 42: 5493–5501.
- Kim HY, Yun YJ, Park CG, Lee DH, Cho YK, et al. (2007) Outbreak of *Mycobacterium massiliense* infection associated with intramuscular injections. J Clin Microbiol 45: 3127–3130.
- Viana-Niero C, Lima KV, Lopes ML, Rabello MC, Marsola LR, et al. (2008) Molecular characterization of *Mycobacterium massiliense* and *Mycobacterium bollettii* in isolates collected from outbreaks of infections after laparoscopic surgeries and cosmetic procedures. J Clin Microbiol 46: 850–855.
- Griffith DE (2003) Emergence of nontuberculous mycobacteria as pathogens in cystic fibrosis. Am J Respir Crit Care Med 167: 810–812.
- Chalermkulrat W, Sood N, Neuringer IP, Hecker TM, Chang L, et al. (2006) Non-tuberculous mycobacteria in end stage cystic fibrosis: implications for lung transplantation. Thorax 61: 507–513.
- Jönsson BE, Gilljam M, Lindblad A, Ridell M, Wold AE, et al. (2007) Molecular epidemiology of *Mycobacterium abscessus*, with focus on cystic fibrosis. J Clin Microbiol 45: 1497–1504.
- Olivier KN, Weber DJ, Wallace RJ Jr, Faiz AR, Lee JH, et al. (2003) Nontuberculous mycobacteria. I: multicenter prevalence study in cystic fibrosis. Am J Respir Crit Care Med 167: 828–834.
- Pierre-Audigier C, Ferroni A, Sermet-Gaudelus I, Le Bourgeois M, Offredo C, et al. (2005) Age-related prevalence and distribution of nontuberculous mycobacterial species among patients with cystic fibrosis. J Clin Microbiol 43: 3467–3470.
- Sanguinetti M, Ardito F, Fiscarelli E, La Sorda M, D’Argenio P, et al. (2001) Fatal pulmonary infection due to multidrug-resistant *Mycobacterium abscessus* in a patient with cystic fibrosis. J Clin Microbiol 39: 816–819.
- Sermet-Gaudelus I, Le Bourgeois M, Pierre-Audigier C, Offredo C, Guillemot D, et al. (2003) *Mycobacterium abscessus* and children with cystic fibrosis. Emerg Infect Dis 9: 1587–1591.
- Tomashefski JF Jr, Stern RC, Demko CA, Doershuk CF (1996) Nontuberculous mycobacteria in cystic fibrosis. An autopsy study. Am J Respir Crit Care Med 154: 523–528.
- Galil K, Miller LA, Yakus MA, Wallace RJ Jr, Mosley DG, et al. (1999) Abscesses due to *Mycobacterium abscessus* linked to injection of unapproved alternative medication. Emerg Infect Dis 5: 681–687.
- Villanueva A, Calderon RV, Vargas BA, Ruiz F, Agüero S, et al. (1997) Report on an outbreak of postinjection abscesses due to *Mycobacterium abscessus*, including management with surgery and clarithromycin therapy and comparison of strains by random amplified polymorphic DNA polymerase chain reaction. Clin Infect Dis 24: 1147–1153.
- Byrd TF, Lyons CR (1999) Preliminary characterization of a *Mycobacterium abscessus* mutant in human and murine models of infection. Infect Immun 67: 4700–4707.
- Rottman M, Catherinot E, Hochedez P, Emile JF, Casanova JL, et al. (2007) Importance of T cells, gamma interferon, and tumor necrosis factor in immune control of the rapid grower *Mycobacterium abscessus* in C57BL/6 mice. Infect Immun 75: 5898–5907.
- Catherinot E, Clarissou J, Etienne G, Ripoll F, Emile JF, et al. (2007) Hypervirulence of a rough variant of the *Mycobacterium abscessus* type strain. Infect Immun 75: 1055–1058.
- Howard ST, Rhoades E, Recht J, Pang X, Alsop A, et al. (2006) Spontaneous reversion of *Mycobacterium abscessus* from a smooth to a rough morphotype is associated with reduced expression of glycopeptidolipid and reacquisition of an invasive phenotype. Microbiology 152: 1581–1590.
- Cole ST, Eigmeier K, Parkhill J, James KD, Thomson NR, et al. (2001) Massive gene decay in the leprosy bacillus. Nature 409: 1007–1011.
- Stinear TP, Mve-Obiang A, Small PL, Frigui W, Pryor MJ, et al. (2004) Giant plasmid-encoded polyketide synthases produce the macrolide toxin of *Mycobacterium ulcerans*. Proc Natl Acad Sci U S A 101: 1345–1349.
- Behr MA, Wilson MA, Gill WP, Salamon H, Schoolnik GK, et al. (1999) Comparative genomics of BCG vaccines by whole-genome DNA microarray. Science 284: 1520–1523.
- Gordon SV, Brosch R, Billault A, Garnier T, Eigmeier K, et al. (1999) Identification of variable regions in the genomes of tubercle bacilli using bacterial artificial chromosome arrays. Mol Microbiol 32: 643–655.
- Kim SJ, Kweon O, Jones RC, Edmondson RD, Cerniglia CE (2008) Genomic analysis of polycyclic aromatic hydrocarbon degradation in *Mycobacterium vanbaalenii* PYR-1. Biodegradation 19: 859–881.
- Stinear TP, Seemann T, Harrison PF, Jenkin GA, Davies JK, et al. (2008) Insights from the complete genome sequence of *Mycobacterium marinum* on the evolution of *Mycobacterium tuberculosis*. Genome Res 18: 729–741.
- Cole ST, Brosch R, Parkhill J, Garnier T, Churcher C, et al. (1998) Deciphering the biology of *Mycobacterium tuberculosis* from the complete genome sequence. Nature 393: 537–544.
- Pedulla ML, Ford ME, Houtz JM, Karthikeyan T, Wadsworth C, et al. (2003) Origins of highly mosaic mycobacteriophage genomes. Cell 113: 171–182.
- Howard ST, Byrd TF, Lyons CR (2002) A polymorphic region in *Mycobacterium abscessus* contains a novel insertion sequence element. Microbiology 148: 2987–2996.
- Gey van Pittius NC, Sampson SL, Lee H, Kim Y, van Helden PD, et al. (2006) Evolution and expansion of the *Mycobacterium tuberculosis* PE and PPE multigene families and their association with the duplication of the ESAT-6 (esx) gene cluster regions. BMC Evol Biol 6: 95.
- Sorensen AL, Nagai S, Houen G, Andersen P, Andersen AB (1995) Purification and characterization of a low-molecular-mass T-cell antigen secreted by *Mycobacterium tuberculosis*. Infect Immun 63: 1710–1717.
- Arruda S, Bomfim G, Knights R, Huima-Byron T, Riley LW (1993) Cloning of an *M. tuberculosis* DNA fragment associated with entry and survival inside cells. Science 261: 1454–1457.
- Ishikawa J, Yamashita A, Mikami Y, Hoshino Y, Kurita H, et al. (2004) The complete genomic sequence of *Nocardia farcinica* IFM 10152. Proc Natl Acad Sci U S A 101: 14925–14930.

**Table S5**

Found at: doi:10.1371/journal.pone.0005660.s006 (0.06 MB DOC)

## Acknowledgments

We thank Veronique Vincent and Cristina Gutierrez (Institut Pasteur, Paris, France) for kindly providing us with strain CIP 104536T, and Raphaël Porcher, Alain Billault and Isabelle Sénégas for assistance. We also thank Stewart Cole for helpful comments on the manuscript.

## Author Contributions

Conceived and designed the experiments: VB JLR JLG. Performed the experiments: FR SP CS CD EM. Analyzed the data: FR SP MR EM BH JLH MD RB JLR. Wrote the paper: FR SP VB RB JLR JLG.

38. Thoma-Uszynski S, Stenger S, Takeuchi O, Ochoa MT, Engele M, et al. (2001) Induction of direct antimicrobial activity through mammalian toll-like receptors. *Science* 291: 1544–1547.
39. Tibball RW (1993) Bacterial phospholipases C. *Microbiol Rev* 57: 347–366.
40. Raynaud C, Guilhot C, Rauzier J, Bordat Y, Pelicic V, et al. (2002) Phospholipases C are involved in the virulence of *Mycobacterium tuberculosis*. *Mol Microbiol* 45: 203–217.
41. Brodin P, Eiglmeier K, Marmiesse M, Billault A, Garnier T, et al. (2002) Bacterial artificial chromosome-based comparative genomic analysis identifies *Mycobacterium microti* as a natural ESAT-6 deletion mutant. *Infect Immun* 70: 5568–5578.
42. Moncrief MB, Maguire ME (1998) Magnesium and the role of MgtC in growth of *Salmonella typhimurium*. *Infect Immun* 66: 3802–3809.
43. Buchmeier N, Blanc-Potard A, Ehrh S, Piddington D, Riley L, et al. (2000) A parallel intraphagosomal survival strategy shared by *Mycobacterium tuberculosis* and *Salmonella enterica*. *Mol Microbiol* 35: 1375–1382.
44. Blanc-Potard AB, Lafay B (2003) MgtC as a horizontally-acquired virulence factor of intracellular bacterial pathogens: evidence from molecular phylogeny and comparative genomics. *J Mol Evol* 57: 479–486.
45. St John G, Brot N, Ruan J, Erdjument-Bromage H, Tempst P, et al. (2001) Peptide methionine sulfoxide reductase from *Escherichia coli* and *Mycobacterium tuberculosis* protects bacteria against oxidative damage from reactive nitrogen intermediates. *Proc Natl Acad Sci U S A* 98: 9901–9906.
46. Lau GW, Hassett DJ, Ran H, Kong F (2004) The role of pyocyanin in *Pseudomonas aeruginosa* infection. *Trends Mol Med* 10: 599–606.
47. Arias-Barrau E, Olivera ER, Luengo JM, Fernandez C, Galan B, et al. (2004) The homogentisate pathway: a central catabolic pathway involved in the degradation of L-phenylalanine, L-tyrosine, and 3-hydroxyphenylacetate in *Pseudomonas putida*. *J Bacteriol* 186: 5062–5077.
48. Ernst RK, D'Argenio DA, Ichikawa JK, Bangera MG, Selgrade S, et al. (2003) Genome mosaicism is conserved but not unique in *Pseudomonas aeruginosa* isolates from the airways of young children with cystic fibrosis. *Environ Microbiol* 5: 1341–1349.
49. Luengo JM, Garcia JL, Olivera ER (2001) The phenylacetyl-CoA catabolon: a complex catabolic unit with broad biotechnological applications. *Mol Microbiol* 39: 1434–1442.
50. Hunt TA, Kooi C, Sokol PA, Valvano MA (2004) Identification of *Burkholderia cenocepacia* genes required for bacterial survival in vivo. *Infect Immun* 72: 4010–4022.
51. Zhou X, He X, Liang J, Li A, Xu T, et al. (2005) A novel DNA modification by sulphur. *Mol Microbiol* 57: 1428–1438.
52. Zhang Y, Yakrus MA, Graviss EA, Williams-Bouyer N, Turenne C, et al. (2004) Pulsed-field gel electrophoresis study of *Mycobacterium abscessus* isolates previously affected by DNA degradation. *J Clin Microbiol* 42: 5582–5587.
53. Nash KA, Brown-Elliott BA, Wallace RJ Jr (2009) A novel gene, erm(41), confers inducible macrolide resistance to clinical isolates of *Mycobacterium abscessus* but is absent from *Mycobacterium chelonae*. *Antimicrob Agents Chemother* 53: 1367–1376.
54. Prammananan T, Sander P, Brown BA, Frischkorn K, Onyi GO, et al. (1998) A single 16S ribosomal RNA substitution is responsible for resistance to amikacin and other 2-deoxystreptamine aminoglycosides in *Mycobacterium abscessus* and *Mycobacterium chelonae*. *J Infect Dis* 177: 1573–1581.
55. Silver S, Phung LT (1996) Bacterial heavy metal resistance: new surprises. *Annu Rev Microbiol* 50: 753–789.
56. Ordonez E, Letek M, Valbuena N, Gil JA, Mateos LM (2005) Analysis of genes involved in arsenic resistance in *Corynebacterium glutamicum* ATCC 13032. *Appl Environ Microbiol* 71: 6206–6215.
57. Barkay T, Miller SM, Summers AO (2003) Bacterial mercury resistance from atoms to ecosystems. *FEMS Microbiol Rev* 27: 355–384.
58. Wheeler PR, Ratledge C (1994) Tuberculosis: Pathogenesis, Protection and Control. In: Bloom BR, ed (1994) American Society for Microbiology. pp 353–385.
59. Rodriguez-Zaragoza S (1994) Ecology of free-living amoebae. *Crit Rev Microbiol* 20: 225–241.
60. Prithiviraj B, Bais HP, Weir T, Suresh B, Najarro EH, et al. (2005) Down regulation of virulence factors of *Pseudomonas aeruginosa* by salicylic acid attenuates its virulence on *Arabidopsis thaliana* and *Caenorhabditis elegans*. *Infect Immun* 73: 5319–5328.
61. Le Dantec C, Duguet JP, Montiel A, Dumoutier N, Dubrou S, et al. (2002) Occurrence of mycobacteria in water treatment lines and in water distribution systems. *Appl Environ Microbiol* 68: 5318–5325.
62. Danelishvili L, Wu M, Stang B, Harriff M, Cirillo SL, et al. (2007) Identification of *Mycobacterium avium* pathogenicity island important for macrophage and amoeba infection. *Proc Natl Acad Sci U S A* 104: 11038–11043.
63. Becq J, Gutierrez MC, Rosas-Magallanes V, Rauzier J, Gicquel B, et al. (2007) Contribution of horizontally acquired genomic islands to the evolution of the tubercle bacilli. *Mol Biol Evol* 24: 1861–1871.
64. Rosas-Magallanes V, Deschavanne P, Quintana-Murci L, Brosch R, Gicquel B, et al. (2006) Horizontal transfer of a virulence operon to the ancestor of *Mycobacterium tuberculosis*. *Mol Biol Evol* 23: 1129–1135.
65. Hall-Stoodley L, Lappin-Scott H (1998) Biofilm formation by the rapidly growing mycobacterial species *Mycobacterium fortuitum*. *FEMS Microbiol Lett* 168: 77–84.
66. Davey ME, O'Toole G A (2000) Microbial biofilms: from ecology to molecular genetics. *Microbiol Mol Biol Rev* 64: 847–867.
67. Jang J, Becq J, Gicquel B, Deschavanne P, et al. (2008) Horizontally acquired genomic islands in the tubercle bacilli. *Trends Microbiol* 16: 303–308.
68. Posfai G, Plunkett G 3rd, Feher T, Frisch D, Keil GM, et al. (2006) Emergent properties of reduced-genome *Escherichia coli*. *Science* 312: 1044–1046.
69. Lyczak JB, Cannon CL, Pier GB (2002) Lung infections associated with cystic fibrosis. *Clin Microbiol Rev* 15: 194–222.
70. Stover CK, Pham XQ, Erwin AL, Mizoguchi SD, Warriner P, et al. (2000) Complete genome sequence of *Pseudomonas aeruginosa* PA01, an opportunistic pathogen. *Nature* 406: 959–964.
71. Weingart CL, Hooke AM (1999) A nonhemolytic phospholipase C from *Burkholderia cepacia*. *Curr Microbiol* 38: 233–238.
72. Guina T, Purvine SO, Yi EC, Eng J, Goodlett DR, et al. (2003) Quantitative proteomic analysis indicates increased synthesis of a quinolone by *Pseudomonas aeruginosa* isolates from cystic fibrosis airways. *Proc Natl Acad Sci U S A* 100: 2771–2776.
73. Maloney KE, Valvano MA (2006) The mgtC gene of *Burkholderia cenocepacia* is required for growth under magnesium limitation conditions and intracellular survival in macrophages. *Infect Immun* 74: 5477–5486.
74. Mathee K, Narasimhan G, Valdes C, Qiu X, Matewish JM, et al. (2008) Dynamics of *Pseudomonas aeruginosa* genome evolution. *Proc Natl Acad Sci U S A* 105: 3100–3105.
75. Lagesen K, Hallin P, Rodland EA, Staerfeldt HH, Rognes T, et al. (2007) RNAmmer: consistent and rapid annotation of ribosomal RNA genes. *Nucleic Acids Res* 35: 3100–3108.
76. Lowe TM, Eddy SR (1997) tRNAscan-SE: a program for improved detection of transfer RNA genes in genomic sequence. *Nucleic Acids Res* 25: 955–964.
77. Altschul SF, Madden TL, Schaffer AA, Zhang J, Zhang Z, et al. (1997) Gapped BLAST and PSI-BLAST: a new generation of protein database search programs. *Nucleic Acids Res* 25: 3389–3402.
78. Glemet E, Codani JJ (1997) LASSAP, a LArge Scale Sequence compARison Package. *Comput Appl Biosci* 13: 137–143.
79. Rutherford K, Parkhill J, Crook J, Horsnell T, Rice P, et al. (2000) Artemis: sequence visualization and annotation. *Bioinformatics* 16: 944–945.
80. Frank AC, Lobry JR (2000) Oriloc: prediction of replication boundaries in unannotated bacterial chromosomes. *Bioinformatics* 16: 560–561.
81. Mohseni-Zadeh S, Brezellec P, Risler JL (2004) Cluster-C, an algorithm for the large-scale clustering of protein sequences based on the extraction of maximal cliques. *Comput Biol Chem* 28: 211–218.
82. Vernikos GS, Parkhill J (2006) Interpolated variable order motifs for identification of horizontally acquired DNA: revisiting the *Salmonella* pathogenicity islands. *Bioinformatics* 22: 2196–2203.
83. Luc N, Risler JL, Bergeron A, Raffinot M (2003) Gene teams: a new formalization of gene clusters for comparative genomics. *Comput Biol Chem* 27: 59–67.
84. Edgar RC (2004) MUSCLE: multiple sequence alignment with high accuracy and high throughput. *Nucleic Acids Res* 32: 1792–1797.
85. Guindon S, Gascuel O (2003) A simple, fast, and accurate algorithm to estimate large phylogenies by maximum likelihood. *Syst Biol* 52: 696–704.
86. Anisimova M, Gascuel O (2006) Approximate likelihood-ratio test for branches: A fast, accurate, and powerful alternative. *Syst Biol* 55: 539–552.
87. Stinear TP, Seemann T, Pidot S, Frigui W, Reysset G, et al. (2007) Reductive evolution and niche adaptation inferred from the genome of *Mycobacterium ulcerans*, the causative agent of Buruli ulcer. *Genome Res* 17: 192–200.
